# Supplementary material
Source: PubMed Central journal article supplement (PMC3694335)
Supplement: NIHMS472070-supplement-01.pdf [file NIHMS472070-supplement-01.pdf]

**Supplementary Table 1:** Baseline characteristics of patients included in the current sub analysis, patients excluded, and the interaction of these differences with randomization to digoxin.

| <b>Characteristics</b>            | <b>Analyzed Cohort<br/>(n=980 )</b> | <b>Excluded<br/>Patients<br/>(n=6,818)</b> | <b>p</b> | <b>p Interaction With<br/>Randomization to<br/>Digoxin</b> |
|-----------------------------------|-------------------------------------|--------------------------------------------|----------|------------------------------------------------------------|
| <b>Demographics</b>               |                                     |                                            |          |                                                            |
| Age                               | 63.4 ± 10.5                         | 64.0 ± 11.0                                | 0.132    | 0.234                                                      |
| White race                        | 88.60%                              | 85.10%                                     | 0.004    | 0.661                                                      |
| Male                              | 78.60%                              | 74.80%                                     | 0.010    | 0.549                                                      |
| <b>Past Medical History</b>       |                                     |                                            |          |                                                            |
| Hypertension                      | 43.00%                              | 47.80%                                     | 0.005    | 0.197                                                      |
| Diabetes mellitus                 | 25.40%                              | 28.90%                                     | 0.023    | 0.052                                                      |
| Angina                            | 26.00%                              | 27.30%                                     | 0.389    | 0.899                                                      |
| Prior myocardial<br>infarction    | 68.40%                              | 62.30%                                     | <0.001   | 0.483                                                      |
| <b>Physical Examination</b>       |                                     |                                            |          |                                                            |
| Heart rate                        | 76.5 ± 12.6                         | 78.7 ± 12.6                                | <0.001   | 0.511                                                      |
| Systolic blood pressure<br>(mmHg) | 126.6 ± 20.2                        | 127.4 ± 20.5                               | 0.235    | 0.415                                                      |
| Pulmonary crackles                | 71.00%                              | 71.60%                                     | 0.731    | 0.481                                                      |
| S3 gallop                         | 49.40%                              | 47.90%                                     | 0.373    | 0.145                                                      |
| Edema                             | 50.20%                              | 53.20%                                     | 0.077    | 0.197                                                      |
| Jugular venous<br>distention      | 52.20%                              | 51.60%                                     | 0.719    | 0.593                                                      |
| <b>Medications (Baseline)</b>     |                                     |                                            |          |                                                            |

26- Digoxin and Improved Renal Function

|                                    |             |             |        |       |
|------------------------------------|-------------|-------------|--------|-------|
| Prior digoxin                      | 49.90%      | 42.30%      | <0.001 | 0.053 |
| ACE inhibitor                      | 96.20%      | 93.00%      | <0.001 | 0.509 |
| Potassium sparing diuretic         | 11.50%      | 7.10%       | <0.001 | 0.965 |
| Other diuretic                     | 75.70%      | 78.40%      | 0.059  | 0.696 |
| Nitrates                           | 36.20%      | 43.10%      | <0.001 | 0.922 |
| Hydralazine                        | 1.00%       | 1.90%       | 0.017  | 0.898 |
| Laboratory Value                   |             |             |        |       |
| (baseline)                         |             |             |        |       |
| eGFR (mL/min/1.73m <sup>2</sup> )  | 70.0 ± 21.7 | 68.3 ± 24.4 | 0.038  | 0.078 |
| Serum creatinine (mg/dL)           | 1.3 ± 0.4   | 1.3 ± 0.4   | 0.148  | 0.319 |
| Functional Status /                |             |             |        |       |
| Imaging                            |             |             |        |       |
| Ejection fraction (%)              | 31.6 ± 12.2 | 32.0 ± 12.6 | 0.38   | 0.969 |
| Preserved ejection fraction (>45%) | 11.70%      | 12.80%      | 0.338  | 0.972 |
| Cardio-thoracic ratio              | 0.51 ± 0.07 | 0.53 ± 0.07 | 0.082  | 0.632 |
| New York Heart Association class   | 2.1 ± 0.7   | 2.2 ± 0.7   | 0.004  | 0.611 |

---

ACE: Angiotensin converting enzyme inhibitor. eGFR: Estimated glomerular filtration rate
